# Supplementary material for: Noble-metal-free hexagonal wurtzite CdS nanoplates with exposed (110) and (112) crystal facets for efficient visible-light H2 production
Source: Royal Society of Chemistry journal article supplement (doi:10.1039/d0nj04778c), 2020-11-24
Supplement: d0nj04778c1.pdf [file d0nj04778c1.pdf]

## Supplementary Information

### Noble-metal-free hexagonal wurtzite CdS nanoplates with exposed (110) and (112) crystal facets for efficient visible-light H<sub>2</sub> production

Chao Zhang,<sup>a, b, c</sup> Xi Cheng,<sup>a</sup> Baoquan Liu,<sup>a</sup> Zhenmei Guo,<sup>a</sup>

Guangxiang He,<sup>b, \*</sup> and Zhiguo Lv,<sup>a, \*</sup>

a. Key Laboratory of Multiphase Flow Reaction and Separation Engineering of Shandong Province, State Key Laboratory Base for Eco-chemical Engineering, College of Chemical Engineering, Qingdao University of Science and Technology, Qingdao 266042, China

b. Beijing Key Laboratory of Fuel Cleanliness and Efficient Catalytic Emission Reduction Technology, School of Chemical Engineering, Beijing Institute of Petrochemical Technology, Beijing 102617, China

c. Key Laboratory of Advanced Energy Materials Chemistry (Ministry of Education), College of Chemistry, Nankai University, Tianjin 300071, China

### Instrumentations and characterizations

---

\* Corresponding author: Zhiguo Lv; Guangxiang He  
E-mail: lvzhiguo@qust.edu.cn; hgx@bipt.edu.cn

The morphologies of samples were observed by Scanning electron microscopy (SEM, Hitachi S-4800) and Transmission Electron Microscopy (TEM, JEM 2100F, JEOL). The crystal structure of all samples was recorded by X-ray diffraction (XRD) on ULTIMA IV (Rigaku Corporation) with Cu-K $\alpha$  radiation, the range of  $2\theta$  from  $10^\circ$  to  $90^\circ$ , 40 kV of rated voltage and 40 mA of rated current. The X-ray photoelectron spectra (XPS) measurements were carried out using Thermo ESCALAB 250 instruments (USA) with non-monochromatic Al K $\alpha$  1486.6 radiation. The photoluminescence (PL) spectroscopy was measured using fluorescence spectrometer (Shimadzu RF-5301) at the excitation wavelength of 320 nm. The specific surface area was determined from the linear part of the BET equation ( $P/P_0 = 0.05-0.25$ ). The pore size distribution was derived from the desorption branch of the N<sub>2</sub> isotherm using the Barrett–Joyner–Halenda (BJH) method. UV-vis absorption spectra analysis was performed using a Shimadzu UV 3600 spectrometer. In photoelectrochemical measurements, MgSO<sub>4</sub> solution was used as electrolyte and the tests were performed by switching visual light ON/OFF with a duration of 30 s in a typical three-electrode cell.

### **The apparent quantum yield test**

The apparent quantum yield (AQY) of H<sub>2</sub> production of all samples was tested by the same photocatalytic condition except cut-off filters was replaced by bandpass filters ( $420 \pm 10$  nm). The intensity of light is about 1322 mW/cm<sup>2</sup>. The value of AQY was calculated by the following formula:

$$\text{AQY(\%)} = \frac{2 \times \text{number of evolved H}_2 \text{ molecules}}{\text{number of incident photons}} \times 100$$

### **Computational methods**

The calculations in this paper was performed using the first principles density functional theory (DFT), which was based on Quantum Espresso (QE) procedure. This software contained several quantum mechanics computing modules. Among them, we used the PWscf module. The calculation employed a PBE-type ultra-soft functional of GGA-PBE, which is based on the generalized gradient approximation (GGA) exchange correlation approximation. During structural optimization process, the plane wave cutoff energy was set to be 50 Ry. The convergence precision of iterative process (SCF) was  $10^{-6}$ . The convergence index of the maximum atomic displacement was 0.01nm. The maximum force of convergence on an atom was 0.01 eV per atom. The thickness of the vacuum layer is 12 angstrom.

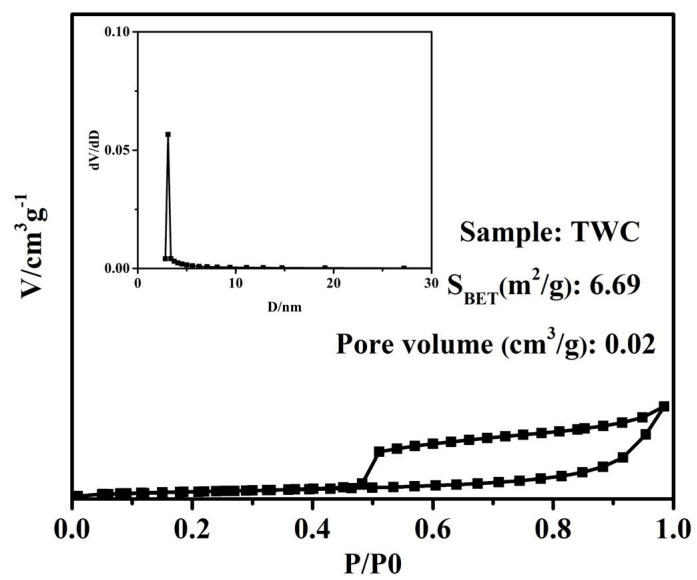

Fig. S1  $\text{N}_2$  adsorption-desorption isotherms of TWC.

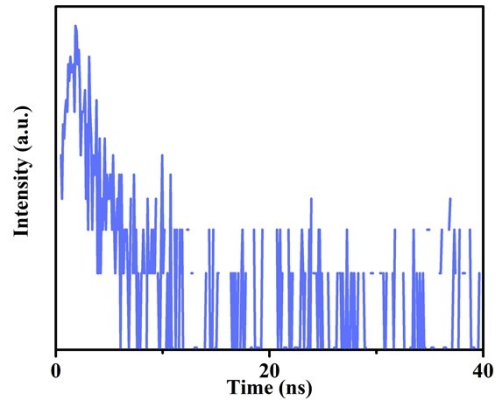

Fig. S2 The steady-state photoluminescence (PL) peak intensity of HWCs.

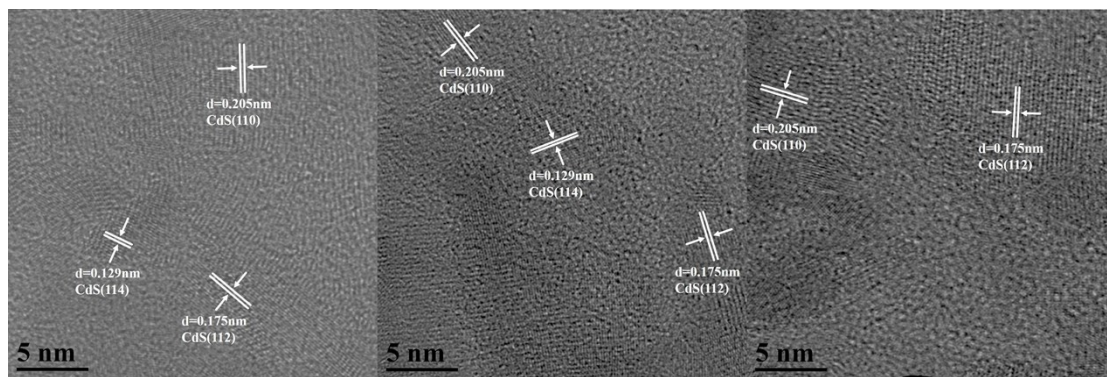

Fig. S3 HRTEM images of HWCs.
